# Supplementary material for: Associations between Different Ozone Indicators and Cardiovascular Hospital Admission: A Time-Stratified Case-Crossover Analysis in Guangzhou, China
Source: MDPI journal article supplement (doi:10.3390/ijerph20032056), 2023-01-23
Supplement: s1 [file s1]

# Supplementary Materials

## Figure Captions

**Figure S1.** Comparison the effects for an IQR increase in different O<sub>3</sub> indicators (MDA8 O<sub>3</sub> (a) and MDA1 O<sub>3</sub> (b)) on cardiovascular hospitalization admissions in different age groups.

**Figure S2.** Comparison the effects for an IQR increase in different O<sub>3</sub> indicators (MDA8 O<sub>3</sub> (a) and MDA1 O<sub>3</sub> (b)) on cardiovascular hospitalization admissions in different gender groups.

**Figure S3.** Comparison the effects for an IQR increase in MDA8 O<sub>3</sub> on cardiovascular hospitalization admissions during the warm periods ((a) and (b)) and the cold periods ((c) and (d)).

**Figure S4.** Comparison the effects for an IQR increase in MDA1 O<sub>3</sub> on cardiovascular hospitalization admissions during the warm periods ((a) and (b)) and the cold periods ((c) and (d)).

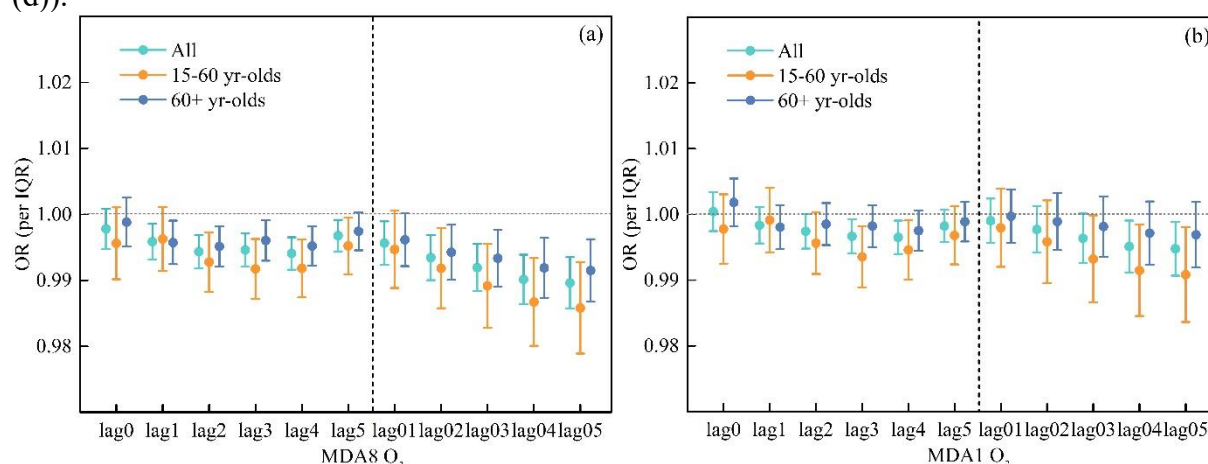

**Figure S1.** Comparison the effects for an IQR increase in different O<sub>3</sub> indicators (MDA8 O<sub>3</sub> (a) and MDA1 O<sub>3</sub> (b)) on cardiovascular hospitalization admissions in different age groups.

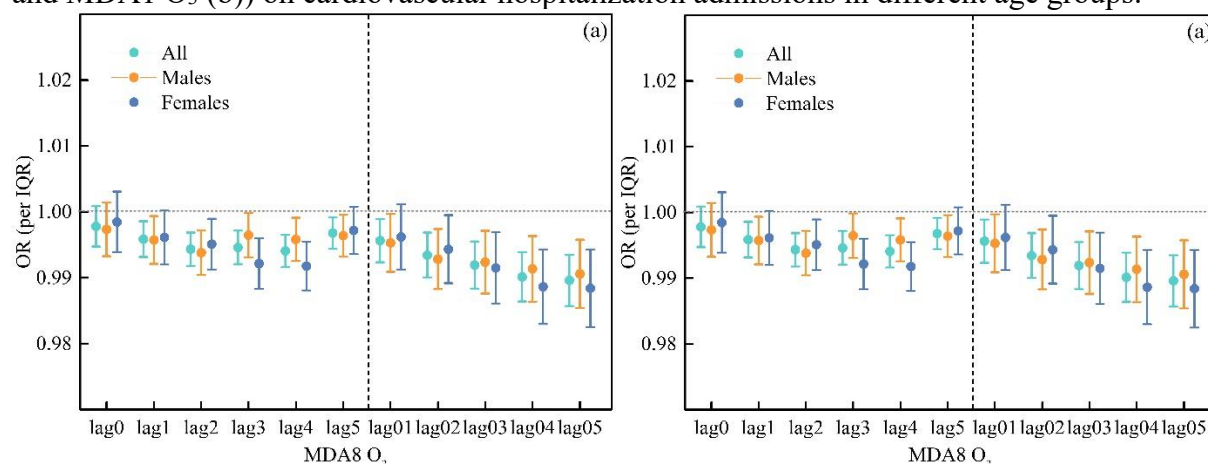

**Figure S2.** Comparison the effects for an IQR increase in different O<sub>3</sub> indicators (MDA8 O<sub>3</sub> (a) and MDA1 O<sub>3</sub> (b)) on cardiovascular hospitalization admissions in different gender groups.



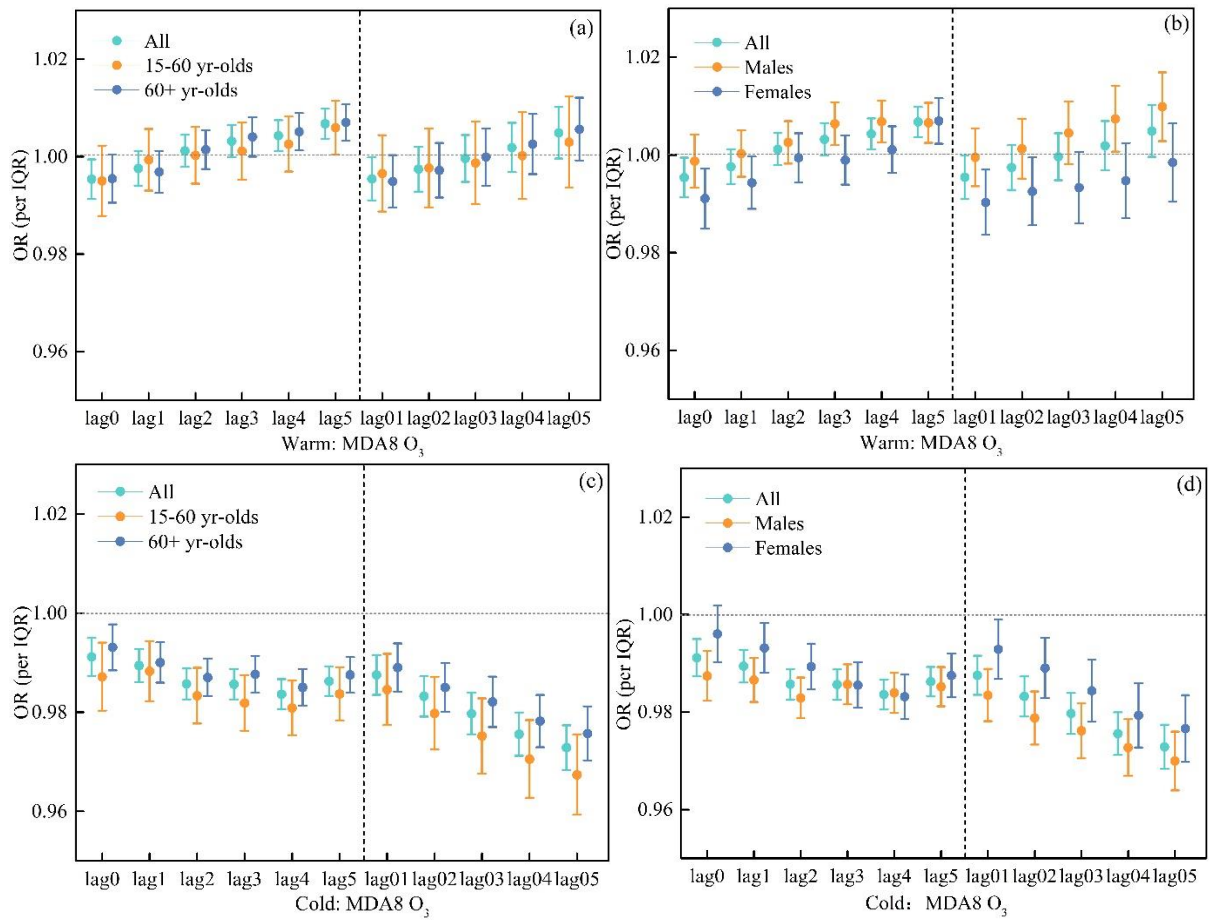

**Figure S3.** Comparison the effects for an IQR increase in MDA8 O<sub>3</sub> on cardiovascular hospitalization admissions during the warm periods ((a) and (b)) and the cold periods ((c) and (d)).

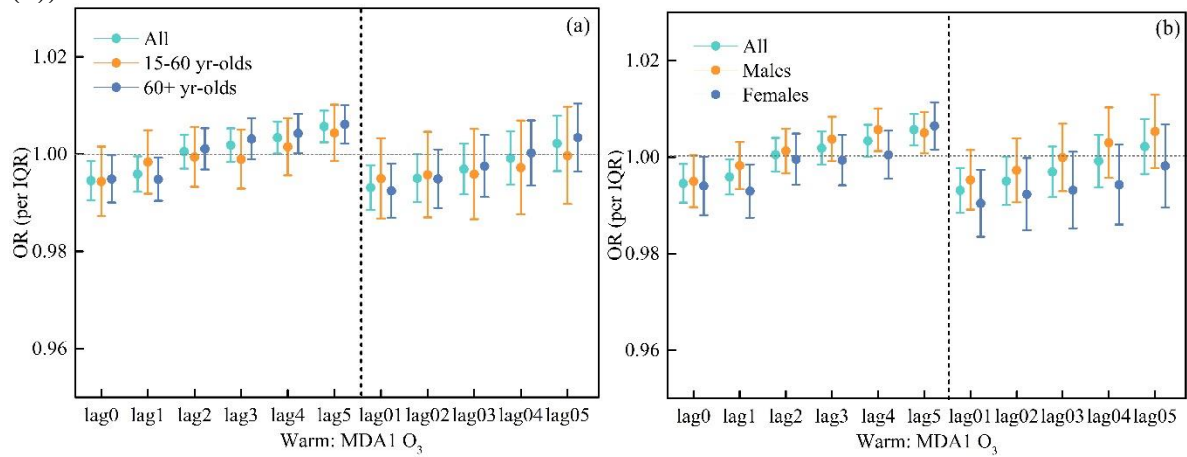



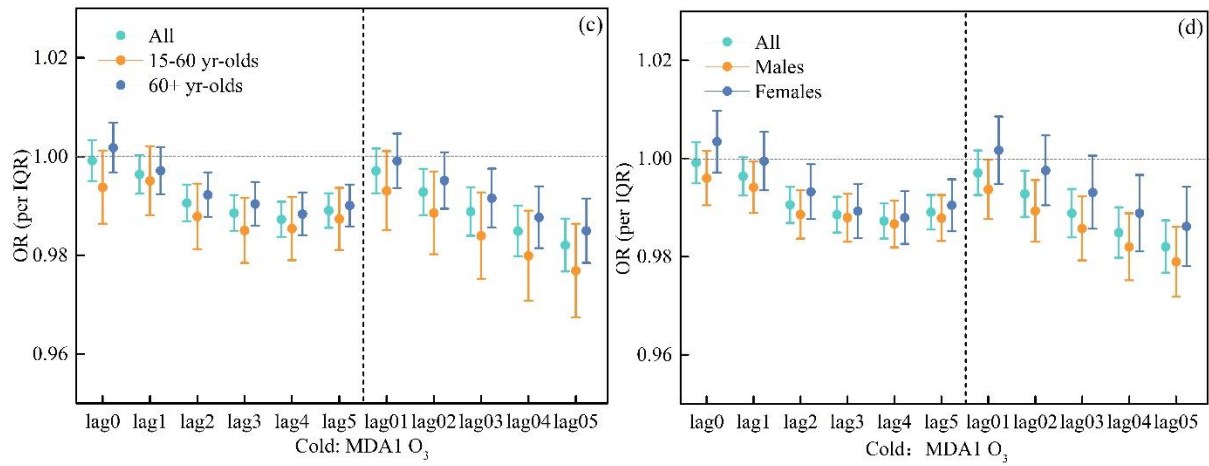

**Figure S4.** Comparison the effects for an IQR increase in MDA1 O<sub>3</sub> on cardiovascular hospitalization admissions during the warm periods ((a) and (b)) and the cold periods ((c) and (d)).
